# Supplementary material for: Dynamics of epigenetic regulator gene BCOR mutation and response predictive value for hypomethylating agents in patients with myelodysplastic syndrome
Source: PubMed Central journal article supplement (PMC8404357; doi:10.1186/s13148-021-01157-8), 2021-08-30

## Supplementary data 1

**Table S I Characteristics of 43 patients with myelodysplastic syndromes harboring BCOR mutations**

| Case No. | Gender | Age (year) | subtype | BM Blast (%) | Karyotype                            | BCOR mutations (VAF %)                         | Concomitant mutations                    |
|----------|--------|------------|---------|--------------|--------------------------------------|------------------------------------------------|------------------------------------------|
| 1        | F      | 23         | RAEB-2  | 18.0         | Normal                               | BCOR/4/C925Y (51)                              | DHX9, WT1                                |
| 2        | M      | 80         | RAEB-1  | 8.4          | 47,XY,+8[10]/46,XY[10]               | BCOR/11/K1452X (60)                            | DNMT3A, ROBO1, STAG2                     |
| 3        | M      | 40         | RAEB-2  | 3.6 (Auer)   | 46,XY,del(20)(q12q13)[20]            | BCOR/8/R1323W (50)                             | NPM1                                     |
| 4        | F      | 36         | RAEB-1  | 5.0          | Normal                               | BCOR/8/K1339N (33)                             | ASXL1, MPL, TET2, UPF3A                  |
| 5        | F      | 56         | RAEB-1  | 8.0          | Normal                               | BCOR/4/A619fs (16)                             | PHF6, RUNX1, TET2                        |
| 6        | M      | 77         | RCMD    | 4.0          | Normal                               | BCOR/4/Y361fs (85)                             | NRAS, ROBO1, RUNX1, U2AF1                |
| 7        | M      | 56         | RCMD    | 2.2          | Normal                               | BCOR/12/R1547*(49)                             | ASXL1, RUNX1, SRSF2                      |
| 8        | M      | 62         | RAEB-1  | 9.5          | Normal                               | BCOR/4/p819-819del (74)                        | DNMT3A, IDH2, ROBO1, RUNX1               |
| 9        | M      | 69         | RAEB-2  | 11.2         | Normal                               | BCOR/7/R1165X (29)<br>/BCOR/11/C4326+1C>A (56) | CEBPA, DNMT3A, RUNX1, STAG2, TET2, U2AF1 |
| 10       | M      | 57         | RAEB-2  | 13.2         | Normal                               | BCOR/7/P1101fs (65)                            | ITIH3                                    |
| 11       | F      | 69         | RAEB-2  | 17.0         | Normal                               | BCOR/4/V912fs (32)                             | ASXL1, STAG2                             |
| 12       | F      | 43         | RCMD    | 3.5          | 47,XX,add(3)(q28),+8[4]<br>/46,XX[5] | BCOR/4/P483L (48)                              | EZH2, IDH1, U2AF1                        |

|    |   |    |        |      |                                                      |                       |                                        |
|----|---|----|--------|------|------------------------------------------------------|-----------------------|----------------------------------------|
| 13 | F | 73 | RAEB-2 | 12.0 | Normal                                               | BCOR/4/T738fs (46)    | EZH2, MPL, RUNX1                       |
| 14 | M | 51 | RAEB-1 | 8.2  | 46,XY,-11,+mar[10]/46,XY,del(7)(q31),inc[3]/46,XY[2] | BCOR/4/P483L (100)    | No                                     |
| 15 | F | 20 | RAEB-1 | 5.0  | Normal                                               | BCOR/10/P1367fs (30)  | RBM, TET2,                             |
| 16 | F | 44 | MDS-U  | 0    | Normal                                               | BCOR/9/L1299fs (30)   | CEBPA, TET2                            |
| 17 | M | 21 | RT     | 0.6  | Normal                                               | BCOR/8/L1299fs (30)   | ASXL1, CALR, MPL                       |
| 18 | F | 46 | RAEB-2 | 15.0 | Normal                                               | BCOR/4/T591fs (45)    | DNMT3A; IDH2,                          |
| 19 | M | 70 | RAEB-1 | 7.8  | 46,XY,inv(1)(q21q25),del(5)(q22q35[9])/46,XY[9]      | BCOR/4/P483L (100)    | DNMT3A, JAK2, RUNX1, TET2, TP53, U2AF1 |
| 20 | M | 68 | RAEB-1 | 7.5  | Normal                                               | BCOR/4/T870fs (44)    | ASXL1, DHX9, STAG2                     |
| 21 | F | 52 | RCMD   | 1.0  | Normal                                               | BCOR/7/R1165X (24)    | No                                     |
| 22 | M | 46 | RCMD   | 0.1  | 47,XY,+8[10]/46,XY[10]                               | BCOR/4/P483L (100)    | ASXL1, JAK2, ANKRD11                   |
| 23 | M | 18 | RCMD   | 0.4  | Normal                                               | BCOR/8/G1342X (14)    | IDH1                                   |
| 24 | F | 35 | RCMD   | 0.5  | Normal                                               | BCOR/4/R810X (12)     | ASXL1, IDH1                            |
| 25 | M | 70 | RCMD   | 1.8  | Normal                                               | BCOR/8/R1183X (39)    | JAK2, STAG2                            |
| 26 | F | 54 | RCMD   | 0.4  | Normal                                               | BCOR/4/S526L (52)     | EZH2, KIF20B, SETBP1                   |
| 27 | M | 64 | RT     | 2.0  | 46XY, +8[5]/46XY[15]                                 | BCOR/15/K1672* (13)   | ASXL1, STAG2, TET2                     |
| 28 | M | 84 | RAEB-1 | 6.0  | Normal                                               | BCOR/13/O1606X (21)   | ASXL1, SRSF2                           |
| 29 | F | 41 | RCMD   | 3.0  | Normal                                               | BCOR/6/P1083fs (21.4) | No                                     |
| 30 | F | 54 | RCMD   | 2.5  | Normal                                               | BCOR/4/P483L (46)     | No                                     |
| 31 | M | 44 | RT     | 2.5  | Normal                                               | BCOR/4/I501fs (60)    | IDH2, U2AF1                            |
| 32 | F | 77 | RCMD   | 3.6  | Normal                                               | BCOR/4/P483L (80)     | DNMT3A                                 |

|    |   |    |        |      |                                                                       |                      |                                |
|----|---|----|--------|------|-----------------------------------------------------------------------|----------------------|--------------------------------|
| 33 | M | 61 | RAEB-1 | 7.4  | Normal                                                                | BCOR/10/1380C (62)   | ASXL1                          |
| 34 | M | 72 | RCMD   | 1.0  | Normal                                                                | BCOR/4/T819fs (91)   | MPL, ROBO1                     |
| 35 | F | 54 | RAEB-2 | 19.0 | 44,XX,-2,-4,del(5)(q13q33),der(11),-16,-17,del(20)(q11),+2mar,inc[15] | BCOR/4/P483L (50)    | SETBP1, TET2, TP53, ROBO2      |
| 36 | F | 65 | RAEB-2 | 18.0 | 46,XX,del(20)(q12)[10]                                                | BCOR/9/V1351M (54)   | ASXL1, U2AF1                   |
| 37 | M | 67 | RAEB-1 | 5.0  | Normal                                                                | BCOR/4/P483L (100)   | ASXL1, U2AF1                   |
| 38 | M | 77 | RAEB-1 | 7.0  | 48,XY,+8,+2[2]/46,XY[18]                                              | BCOR/13/Y1567fs (28) | ASXL1, TET2, RUNX1             |
| 39 | M | 69 | RAEB-1 | 9.0  | Normal                                                                | BCOR/4/G154fs (76)   | CEBPA, DNMT3A, MPL, STAG2, WT1 |
| 40 | M | 69 | RAS    | 0.6  | Normal                                                                | BCOR/4/P483L (99.5)  | DNMT3A, SF3B1                  |
| 41 | F | 63 | RT     | 0    | 47,XX+8[3]                                                            | BCOR/4/P483L (50)    | No                             |
| 42 | M | 73 | RAEB-2 | 10.0 | 46,XY,t(9;21)(q22;q22)[8]/47,idem,+8[7]/46,XY[2]                      | BCOR/4/S637fs (40)   | ASXL1, EZH2, DHX9, TET2        |
| 43 | F | 28 | RCMD   | 2.6  | 47, XX, del (1)(p22), der(2), del(7)(q31), +8, der(17)[8]/46,XX[10]   | BCOR/4/R861H (49)    | No                             |

**Figure S1**

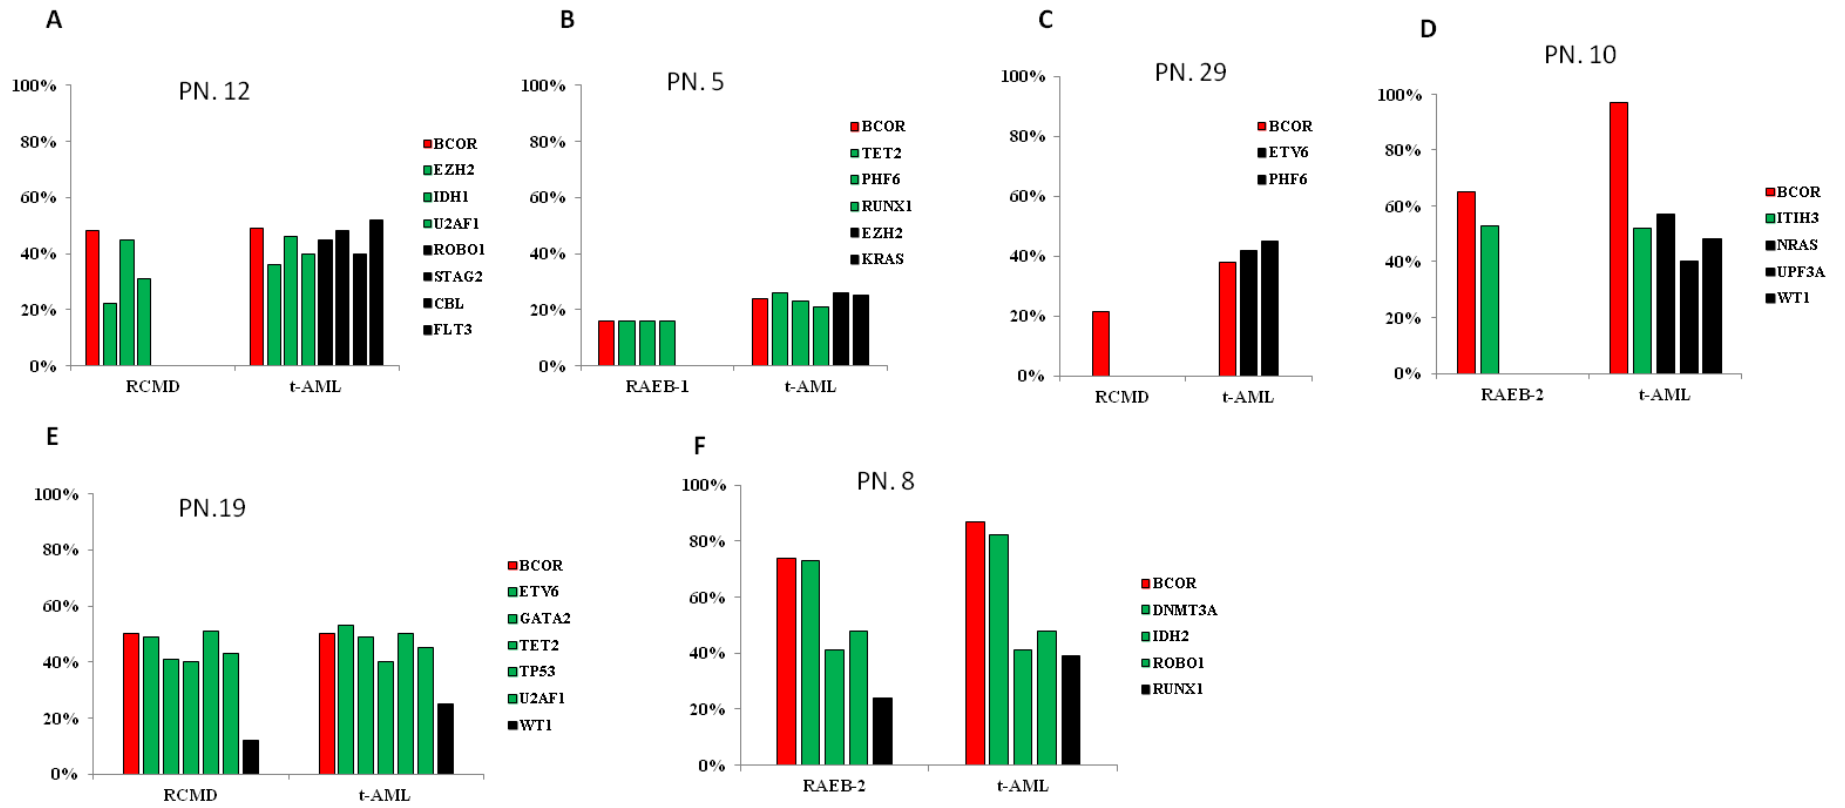

Supplement: 13148_2021_1157_MOESM1_ESM.pdf [file 13148_2021_1157_MOESM1_ESM.pdf]
